# Supplementary material for: Seven entangled coordination polymers assembled from triphenylamine-based bisimidazole and dicarboxylates: interpenetration, self-penetration and mixed entanglement
Source: Royal Society of Chemistry journal article supplement (doi:10.1039/c6ce00102e), 2016-01-01
Supplement: c6ce00102e1.pdf [file c6ce00102e1.pdf]

[Supporting information]

## **Seven entangled coordination polymers assembled from triphenylamine-based bisimidazole and polycarboxylates: interpenetration, self-penetration and mixed entanglement**

**Xianmin Guo,<sup>a</sup> Yongnian Yan,<sup>a</sup> Huadong Guo,<sup>\*a</sup> Yanjuan Qi<sup>a</sup> and Chunming Liu<sup>a</sup>**

<sup>a</sup> *Department of Chemistry, Changchun Normal University, Changchun, 130032, P. R. China. Fax: +86-431-86168093; Tel: +86-431-86168210; E-mail: [hdxmguo@163.com](mailto:hdxmguo@163.com)*

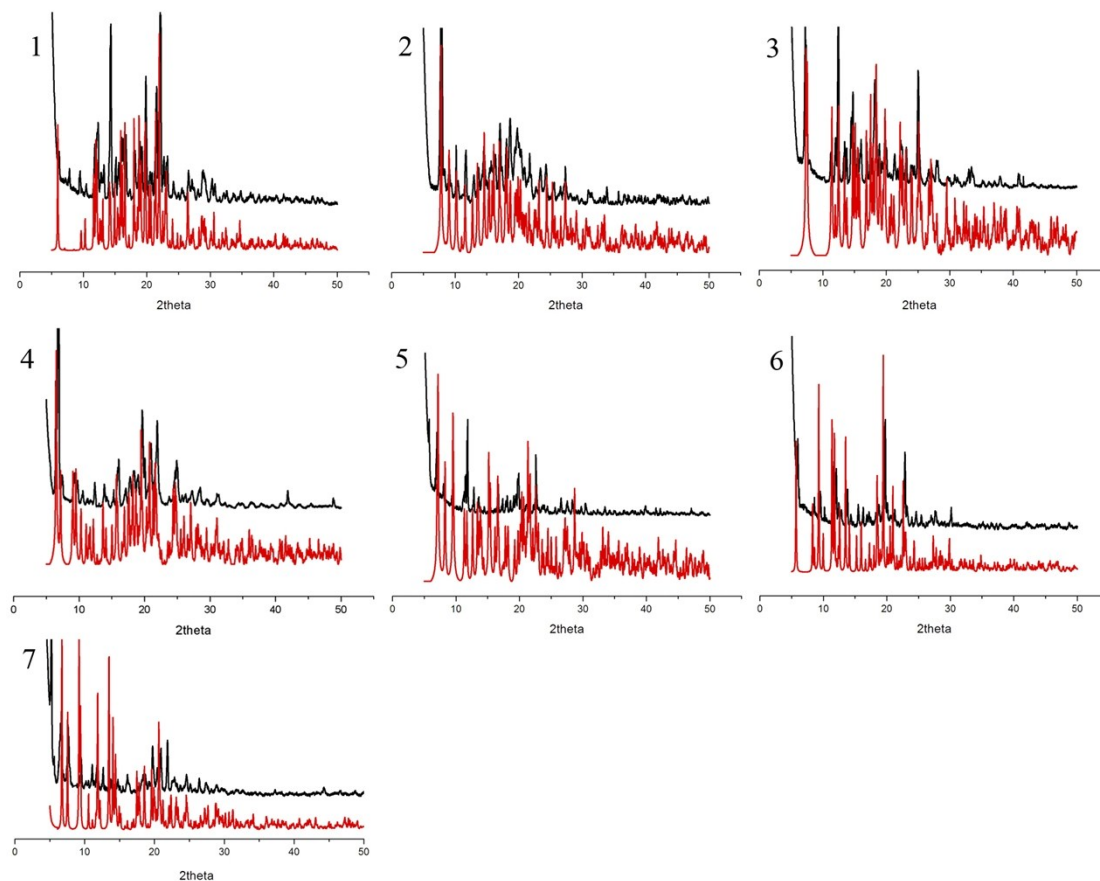

**Fig. S1.** The simulated (red) and experimental (black) XRPD patterns for 1-7.

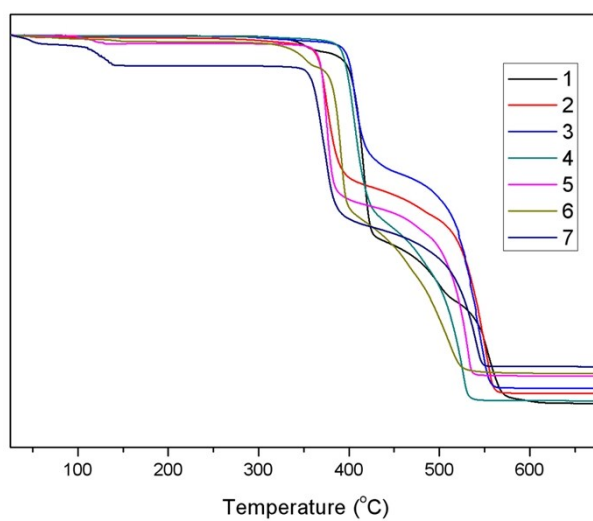

**Fig. S2.** TGA curves of 1-7.

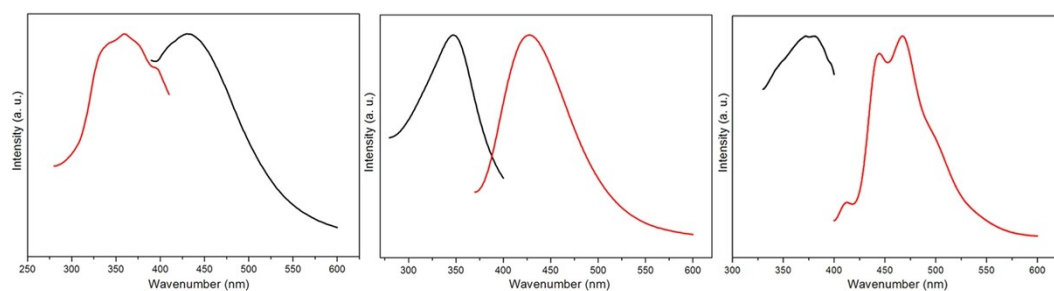

**Fig. S3.** Excitation (black) and emission (red) spectra of H<sub>2</sub>sdc (left), H<sub>2</sub>bpcd (middle) and H<sub>2</sub>sda (right).

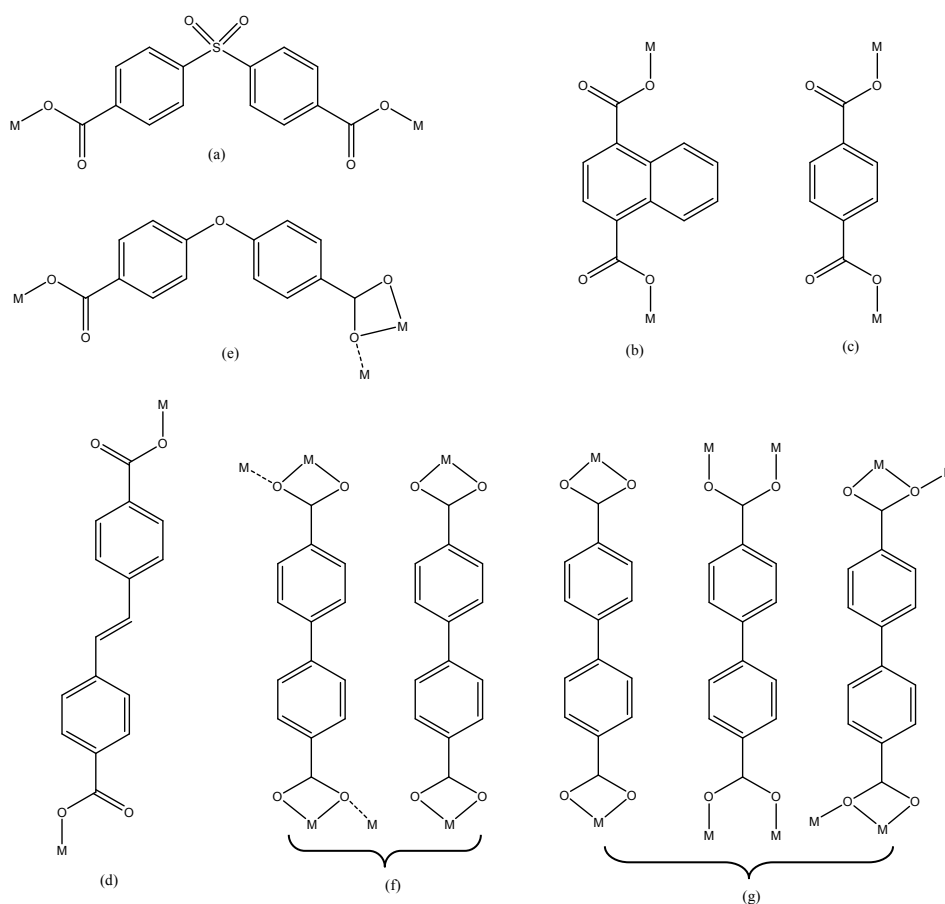

**Fig. S4.** The coordination modes of the dicarboxylates in compounds **1-7**. (a for **1**, b for **2**, c for **3**, d for **4**, e for **5**, f for **6** and g for **7**).

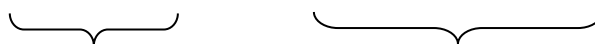

**Table S1.** Selected bond distances (Å) and angles (°) for **1**.

---

|                     |            |
|---------------------|------------|
| Zn(1) - N(1)        | 1.982(3)   |
| Zn(1) - O(2)        | 1.927(3)   |
| Zn(1)-N(5)#4        | 2.032(3)   |
| Zn(1)-O(3)#3        | 1.947(3)   |
| O(2)-Zn(1)-O(3)#3   | 103.26(14) |
| O(2)-Zn(1)-N(1)     | 122.88(12) |
| O(3)#3-Zn(1)-N(1)   | 116.16(13) |
| O(2)-Zn(1)-N(5)#4   | 99.16(13)  |
| O(3)#3-Zn(1)-N(5)#4 | 106.41(13) |
| N(1)-Zn(1)-N(5)#4   | 106.73(13) |

---

Symmetry transformations used to generate equivalent atoms: #3  $-x+5/2, y+1/2, -z+1/2$ ;  
#4  $-x-1/2, y-1/2, -z+1/2$ .

**Table S2.** Selected bond distances (Å) and angles (°) for **2**.

---

|                     |            |
|---------------------|------------|
| Zn(1) - N(1)        | 1.998(4)   |
| Zn(1)-N(5)#4        | 2.010(4)   |
| Zn(1) - O(1)        | 1.924(4)   |
| Zn(1)-O(4)#3        | 1.947(4)   |
| O(1)-Zn(1)-O(4)#3   | 102.92(18) |
| O(1)-Zn(1)-N(1)     | 111.5(2)   |
| O(4)#3-Zn(1)-N(1)   | 116.22(18) |
| O(1)-Zn(1)-N(5)#4   | 116.28(19) |
| O(4)#3-Zn(1)-N(5)#4 | 96.94(19)  |
| N(1)-Zn(1)-N(5)#4   | 112.12(17) |

---

Symmetry transformations used to generate equivalent atoms: #3  $x+1/2, -y+1/2, z+1/2$ ;  
#4  $x-1/2, -y-1/2, z+1/2$

**Table S3.** Selected bond distances (Å) and angles (°) for **3**.

---

|                   |            |
|-------------------|------------|
| Zn(1) - N(1)      | 2.006(2)   |
| Zn(1) - O(2)      | 1.941(2)   |
| Zn(1) - O(3)      | 1.9667(19) |
| Zn(1)-N(5)#3      | 1.997(2)   |
| O(2)-Zn(1)-O(3)   | 102.23(7)  |
| O(2)-Zn(1)-N(5)#3 | 110.00(9)  |
| O(3)-Zn(1)-N(5)#3 | 114.47(9)  |
| O(2)-Zn(1)-N(1)   | 114.34(9)  |
| O(3)-Zn(1)-N(1)   | 103.64(9)  |
| N(5)#3-Zn(1)-N(1) | 111.77(9)  |

---

Symmetry transformations used to generate equivalent atoms: #3 -x+2,-y+2,-z

**Table S4.** Selected bond distances (Å) and angles (°) for **4**.

---

|                   |            |
|-------------------|------------|
| Zn(1) - N(1)      | 2.044(4)   |
| Zn(1)-N(5)#4      | 2.046(3)   |
| Zn(1) - O(1)      | 1.941(3)   |
| Zn(1) - O(3)      | 2.278(4)   |
| Zn(1) - O(4)      | 2.096(4)   |
| O(1)-Zn(1)-N(1)   | 112.43(14) |
| O(1)-Zn(1)-N(5)#4 | 110.70(13) |
| N(1)-Zn(1)-N(5)#4 | 102.36(14) |
| O(1)-Zn(1)-O(4)   | 120.52(17) |
| N(1)-Zn(1)-O(4)   | 117.59(16) |
| N(5)#4-Zn(1)-O(4) | 88.23(14)  |
| O(1)-Zn(1)-O(3)   | 89.98(14)  |
| N(1)-Zn(1)-O(3)   | 93.58(15)  |
| N(5)#4-Zn(1)-O(3) | 145.96(14) |
| O(4)-Zn(1)-O(3)   | 57.75(14)  |

---

Symmetry transformations used to generate equivalent atoms: #3  $x-1,y-1,z$ ; #4  $x+1,y+1,z$

**Table S5.** Selected bond distances (Å) and angles (°) for **5**.

---

|                     |            |
|---------------------|------------|
| Cd(1) - N(1)        | 2.339(3)   |
| Cd(1) - N(5)#3      | 2.265(2)   |
| Cd(1) - O(1)        | 2.1695(19) |
| Cd(1)-O(4)#4        | 2.300(2)   |
| Cd(1)-O(5)#4        | 2.556(2)   |
| O(1)-Cd(1)-N(5)#3   | 128.55(8)  |
| O(1)-Cd(1)-O(4)#4   | 139.37(8)  |
| N(5)#3-Cd(1)-O(4)#4 | 84.82(8)   |
| O(1)-Cd(1)-N(1)     | 96.76(9)   |
| N(5)#3-Cd(1)-N(1)   | 96.42(9)   |
| O(4)#4-Cd(1)-N(1)   | 102.08(9)  |
| O(1)-Cd(1)-O(5)#4   | 96.49(8)   |
| N(5)#3-Cd(1)-O(5)#4 | 134.90(8)  |
| O(4)#4-Cd(1)-O(5)#4 | 53.80(7)   |
| N(1)-Cd(1)-O(5)#4   | 78.15(8)   |

---

Symmetry transformations used to generate equivalent atoms: #3  $x+1,-y,z+1/2$ ;  
#4  $x+1/2,-y+1/2,z-1/2$ .

**Table S6.** Selected bond distances (Å) and angles (°) for **6**.

---

|                 |            |
|-----------------|------------|
| Cd(1) - N(1)    | 2.235(3)   |
| Cd(1) - N(5)#4  | 2.374(4)   |
| Cd(1) - O(1)    | 2.367(3)   |
| Cd(1) - O(2)    | 2.364(7)   |
| Cd(1) - O(2')   | 2.397(7)   |
| Cd(1) - O(3)    | 2.227(3)   |
| O(3)-Cd(1)-N(1) | 139.29(15) |

---



|                    |            |
|--------------------|------------|
| O(3)-Cd(1)-O(2)    | 83.1(2)    |
| N(1)-Cd(1)-O(2)    | 135.5(2)   |
| O(3)-Cd(1)-O(1)    | 108.25(13) |
| N(1)-Cd(1)-O(1)    | 93.08(12)  |
| O(2)-Cd(1)-O(1)    | 51.83(19)  |
| O(3)-Cd(1)-N(5)#4  | 104.95(13) |
| N(1)-Cd(1)-N(5)#4  | 89.73(12)  |
| O(2)-Cd(1)-N(5)#4  | 90.3(2)    |
| O(1)-Cd(1)-N(5)#4  | 124.08(12) |
| O(3)-Cd(1)-O(2')   | 102.0(2)   |
| N(1)-Cd(1)-O(2')   | 118.6(2)   |
| O(2)-Cd(1)-O(2')   | 21.65(19)  |
| O(1)-Cd(1)-O(2')   | 54.75(17)  |
| N(5)#4-Cd(1)-O(2') | 75.33(19)  |

---

Symmetry transformations used to generate equivalent atoms: #4 x,y,z-1.

**Table S7.** Selected bond distances (Å) and angles (°) for **7**.

---

|               |        |
|---------------|--------|
| Cd(1)-N(5)#4  | 2.2647 |
| Cd(1) - O(1)  | 2.4484 |
| Cd(1) - O(2)  | 2.3116 |
| Cd(1) - O(3)  | 2.2025 |
| Cd(1) - O(5)  | 2.3345 |
| Cd(1) - O(6)  | 2.2905 |
| Cd(1) - O(6') | 2.3448 |
| Cd(2) - N(1)  | 2.2271 |
| Cd(2) - O(1)  | 2.3885 |

|                    |        |
|--------------------|--------|
| Cd(2) - O(4)       | 2.3717 |
| O(3)-Cd(1)-N(5)#4  | 88.6   |
| O(3)-Cd(1)-O(6)    | 120.4  |
| N(5)#4-Cd(1)-O(6)  | 99.4   |
| O(3)-Cd(1)-O(2)    | 142.5  |
| N(5)#4-Cd(1)-O(2)  | 81.0   |
| O(6)-Cd(1)-O(2)    | 96.9   |
| O(3)-Cd(1)-O(5)    | 94.0   |
| N(5)#4-Cd(1)-O(5)  | 151.4  |
| O(6)-Cd(1)-O(5)    | 55.1   |
| O(2)-Cd(1)-O(5)    | 112.2  |
| O(3)-Cd(1)-O(6')   | 112.2  |
| N(5)#4-Cd(1)-O(6') | 97.3   |
| O(2)-Cd(1)-O(6')   | 104.9  |
| O(5)-Cd(1)-O(6')   | 55.5   |
| O(3)-Cd(1)-O(1)    | 100.4  |
| N(5)#4-Cd(1)-O(1)  | 116.5  |
| O(6)-Cd(1)-O(1)    | 126.1  |
| O(2)-Cd(1)-O(1)    | 54.7   |
| O(5)-Cd(1)-O(1)    | 91.1   |
| O(6')-Cd(1)-O(1)   | 133.4  |

---

Symmetry transformations used to generate equivalent atoms: #4 -x+1,-y+1,-z.
